# Supplementary material for: Efficacy of Roflumilast Foam, 0.3%, in Patients With Seborrheic Dermatitis: A Double-blind, Vehicle-Controlled Phase 2a Randomized Clinical Trial
Source: PubMed Central journal article supplement — JAMA Dermatol. 2023 May 3;159(6):613–20. doi: 10.1001/jamadermatol.2023.0846 (PMC10157502; doi:10.1001/jamadermatol.2023.0846), 2023-05-03
Supplement: jamadermatol-e230846-s003.pdf [file jamadermatol-e230846-s003.pdf]

## Supplemental Online Content

Zirwas MJ, Draelos ZD, DuBois J, et al. Efficacy of roflumilast foam, 0.3%, in patients with seborrheic dermatitis: a double-blind, vehicle-controlled phase 2a randomized clinical trial. *JAMA Dermatol*. Published online May 3, 2023.  
doi:10.1001/jamadermatol.2023.0846

**eTable 1.** Excluded Medications and Treatments

**eTable 2.** Investigator Global Assessment (IGA) scale

**eTable 3.** Treatment Emergent Adverse Events by Severity

**eFigure 1.** Study Design

**eFigure 2.** Percentage of Patients Achieving Erythema Success and Erythema score of None (mITT Population)

**eFigure 3.** Percentage of Patients Achieving Scaling Success and Scaling Score of None (mITT Population)

This supplemental material has been provided by the authors to give readers additional information about their work.

**eTable 1. Excluded Medications and Treatments**

| <b>Excluded Medications and Treatments</b>                                                                                                                 | <b>Wash out period prior to Baseline (Day 0)</b>                                                                           |
|------------------------------------------------------------------------------------------------------------------------------------------------------------|----------------------------------------------------------------------------------------------------------------------------|
| Biologics                                                                                                                                                  | 12 weeks or 5 half-lives, whichever was longer                                                                             |
| Systemic treatment with antifungal agents, corticosteroids, immunosuppressive therapies, retinoids, roflumilast, or apremilast                             | 4 weeks                                                                                                                    |
| Topical antifungals, corticosteroids, calcineurin inhibitors, sulfur-based treatments, medical devices, crisaborole, azelaic acid, or metronidazole        | 2 weeks                                                                                                                    |
| Medicated shampoos (eg, coal tar, keratolytics including salicylic acid, antifungals, zinc pyrithione, selenium sulfide, corticosteroids, medical devices) | 2 weeks                                                                                                                    |
| Topical medications used on the scalp for conditions besides seborrheic dermatitis, eg, use of topical minoxidil for androgenetic alopecia                 | 4 weeks                                                                                                                    |
| Phototherapy, tanning beds, other light emitting devices                                                                                                   | 4 weeks                                                                                                                    |
| Investigational drugs                                                                                                                                      | Biologics: 12 weeks or 5 half-lives, whichever was longer<br>Oral medications: 5 half-lives<br>Topical treatments: 2 weeks |

Eye drop and nasal corticosteroid preparations were allowed. Inhaled corticosteroid preparations were allowed if used for a stable condition and at a stable dose for >28 days before screening and were continued at the same dose throughout the study.

Non-medicated emollients, moisturizers, and sunscreens were allowed once daily as normally used by patients and applied at least 3 hours after application of randomized investigational product to untreated areas only.

**eTable 2. Investigator Global Assessment (IGA) Scale**

| <b>Score</b> | <b>Grade</b>     | <b>Description</b>                                                                                                  |
|--------------|------------------|---------------------------------------------------------------------------------------------------------------------|
| 0            | Completely clear | No erythema, no scaling (hypo-/hyper-pigmentation can be present)                                                   |
| 1            | Almost clear     | Residual slight erythema and/or trace amounts of scaling                                                            |
| 2            | Mild             | Pink to red color and/or slight scaling                                                                             |
| 3            | Moderate         | Distinct redness and/or clearly visible scaling                                                                     |
| 4            | Severe           | Severe erythema (intense, fiery red) and/or severe scaling (coarse, thick scales with flaking onto clothes or skin) |

**eTable 3. Treatment Emergent Adverse Events by Severity**

| <b>n (%)</b>                                               | <b>Roflumilast foam 0.3%<br/>(n = 154)</b> | <b>Vehicle foam<br/>(n = 72)</b> |
|------------------------------------------------------------|--------------------------------------------|----------------------------------|
| Patients with any TEAE                                     | 37 (24.0)                                  | 13 (18.1)                        |
| Grade 1 (Mild)                                             | 17 (11.0)                                  | 6 (8.3)                          |
| Grade 2 (Moderate)                                         | 18 (11.7)                                  | 5 (6.9)                          |
| Grade 3 (Severe)                                           | 2 (1.3)                                    | 2 (2.8)                          |
| Grade 4 (Life-threatening consequences)                    | 0 (0.0)                                    | 0 (0.0)                          |
| Grade 5 (Death related to AE)                              | 0 (0.0)                                    | 0 (0.0)                          |
| Preferred term (listed alphabetically), grade              |                                            |                                  |
| Abdominal pain lower<br>Grade 2 (Moderate)                 | 0 (0.0)                                    | 1 (1.4)                          |
| Acne cystic<br>Grade 1 (Mild)                              | 1 (0.6)                                    | 0 (0.0)                          |
| Actinic keratosis<br>Grade 1 (Mild)                        | 0 (0.0)                                    | 1 (1.4)                          |
| Alanine aminotransferase increased<br>Grade 3 (Severe)     | 0 (0.0)                                    | 1 (1.4)                          |
| Anemia<br>Grade 3 (Severe)                                 | 0 (0.0)                                    | 1 (1.4)                          |
| Application site dysesthesia<br>Grade 1 (Mild)             | 0 (0.0)                                    | 1 (1.4)                          |
| Application site pain<br>Grade 1 (Mild)                    | 1 (0.6)                                    | 1 (1.4)                          |
| Grade 2 (Moderate)                                         | 1 (0.6)                                    | 0 (0.0)                          |
| Arthralgia<br>Grade 2 (Moderate)                           | 0 (0.0)                                    | 1 (1.4)                          |
| Arthropod bite<br>Grade 2 (Moderate)                       | 0 (0.0)                                    | 1 (1.4)                          |
| Aspartate aminotransferase increased<br>Grade 2 (Moderate) | 0 (0.0)                                    | 1 (1.4)                          |
| Atrial fibrillation<br>Grade 1 (Mild)                      | 1 (0.6)                                    | 0 (0.0)                          |
| Atrophic vulvovaginitis<br>Grade 2 (Moderate)              | 1 (0.6)                                    | 0 (0.0)                          |
| Back pain<br>Grade 1 (Mild)                                | 1 (0.6)                                    | 0 (0.0)                          |
| Grade 2 (Moderate)                                         | 1 (0.6)                                    | 0 (0.0)                          |
| Blepharitis<br>Grade 1 (Mild)                              | 1 (0.6)                                    | 0 (0.0)                          |
| Grade 2 (Moderate)                                         | 1 (0.6)                                    | 0 (0.0)                          |
| Breast tenderness<br>Grade 1 (Mild)                        | 1 (0.6)                                    | 0 (0.0)                          |
| Contact dermatitis <sup>a</sup><br>Grade 1 (Mild)          | 3 (1.9)                                    | 2 (2.8)                          |
| Cough<br>Grade 2 (Moderate)                                | 1 (0.6)                                    | 0 (0.0)                          |
| COVID-19<br>Grade 2 (Moderate)                             | 1 (0.6)                                    | 0 (0.0)                          |
| Dehydration<br>Grade 1 (Mild)                              | 1 (0.6)                                    | 1 (1.4)                          |

|                                             |         |         |
|---------------------------------------------|---------|---------|
| Diarrhea<br>Grade 1 (Mild)                  | 2 (1.3) | 0 (0.0) |
| Dizziness<br>Grade 2 (Moderate)             | 1 (0.6) | 0 (0.0) |
| Dyspepsia<br>Grade 1 (Mild)                 | 1 (0.6) | 0 (0.0) |
| Dyspnea<br>Grade 1 (Mild)                   | 1 (0.6) | 0 (0.0) |
| Dyspnea<br>Grade 2 (Moderate)               | 1 (0.6) | 0 (0.0) |
| Essential tremor<br>Grade 2 (Moderate)      | 1 (0.6) | 0 (0.0) |
| Fibromyalgia<br>Grade 2 (Moderate)          | 1 (0.6) | 0 (0.0) |
| Gastroenteritis<br>Grade 2 (Moderate)       | 1 (0.6) | 0 (0.0) |
| Headache<br>Grade 1 (Mild)                  | 1 (0.6) | 0 (0.0) |
| Headache<br>Grade 2 (Moderate)              | 1 (0.6) | 0 (0.0) |
| Hordeolum<br>Grade 2 (Moderate)             | 1 (0.6) | 0 (0.0) |
| Hyperkalaemia<br>Grade 3 (Severe)           | 1 (0.6) | 0 (0.0) |
| Hypertension<br>Grade 2 (Moderate)          | 1 (0.6) | 0 (0.0) |
| Insomnia<br>Grade 1 (Mild)                  | 3 (1.9) | 1 (1.4) |
| Ligament sprain<br>Grade 2 (Moderate)       | 0 (0.0) | 1 (1.4) |
| Migraine<br>Grade 2 (Moderate)              | 1 (0.6) | 0 (0.0) |
| Migraine<br>Grade 3 (Severe)                | 1 (0.6) | 0 (0.0) |
| Milia<br>Grade 1 (Mild)                     | 1 (0.6) | 0 (0.0) |
| Muscle strain<br>Grade 2 (Moderate)         | 1 (0.6) | 0 (0.0) |
| Nasal congestion<br>Grade 1 (Mild)          | 1 (0.6) | 0 (0.0) |
| Nasopharyngitis<br>Grade 2 (Moderate)       | 3 (1.9) | 0 (0.0) |
| Nausea<br>Grade 1 (Mild)                    | 1 (0.6) | 0 (0.0) |
| Oropharyngeal pain<br>Grade 1 (Mild)        | 1 (0.6) | 0 (0.0) |
| Pyrexia<br>Grade 2 (Moderate)               | 1 (0.6) | 0 (0.0) |
| Seborrheic dermatitis<br>Grade 2 (Moderate) | 0 (0.0) | 1 (1.4) |
| Sinusitis<br>Grade 1 (Mild)                 | 1 (0.6) | 0 (0.0) |
| Skin scar contracture<br>Grade 1 (Mild)     | 1 (0.6) | 0 (0.0) |
| Sunburn<br>Grade 1 (Mild)                   | 1 (0.6) | 0 (0.0) |
| Toothache<br>Grade 2 (Moderate)             | 1 (0.6) | 0 (0.0) |

|                                                           |         |         |
|-----------------------------------------------------------|---------|---------|
| Tooth fracture<br>Grade 2 (Moderate)                      | 2 (1.3) | 0 (0.0) |
| Urinary tract infection<br>Grade 1 (Mild)                 | 1 (0.6) | 0 (0.0) |
| Grade 2 (Moderate)                                        | 1 (0.6) | 0 (0.0) |
| Viral upper respiratory tract infection<br>Grade 1 (Mild) | 1 (0.6) | 0 (0.0) |

Abbreviations: AE, adverse event; TEAE, treatment-emergent adverse event.

<sup>a</sup>Contact dermatitis was reported to be unrelated to treatment in all cases and no cases caused interruption of drug application; 2 cases were reported as “poison ivy rash” by investigators.

**eFigure 1. Study Design**

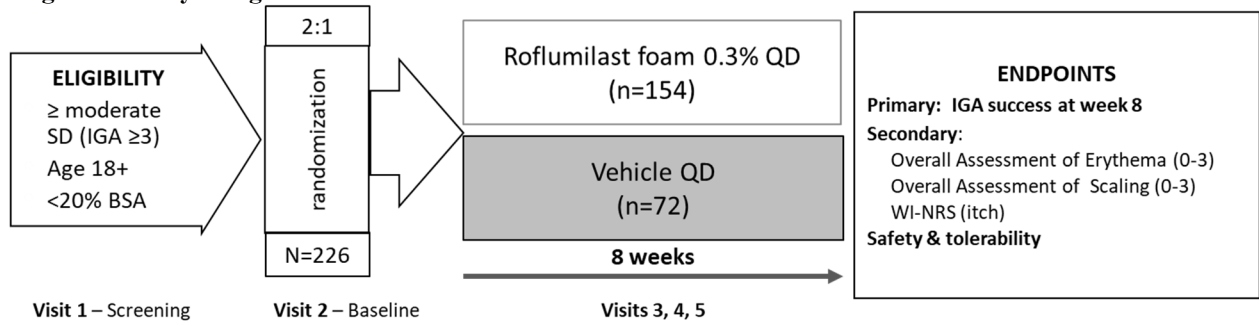

IGA success = clear or almost clear.

BSA, body surface area; IGA, Investigator Global Assessment; QD, once daily; WI-NRS, Worst Itch-Numeric Rating Scale.

**eFigure 2. Percentage of Patients Achieving Erythema Success and Erythema score of None (mITT Population)**

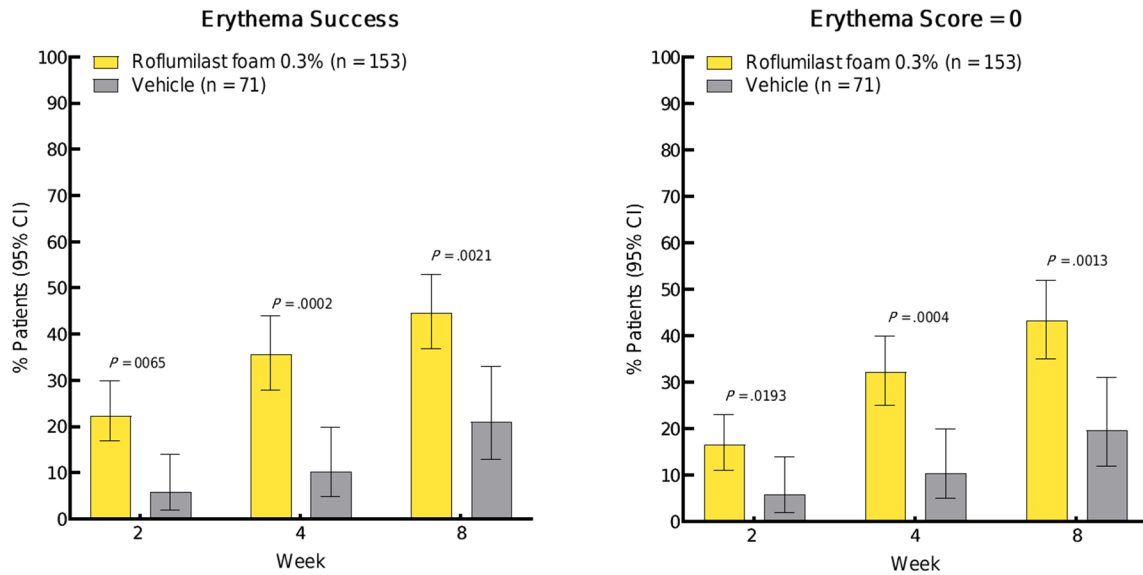

Erythema success = erythema score of 0 or 1 (on a scale of 0 [none] to 3 [severe]) plus a 2-grade improvement from baseline



**eFigure 3. Percentage of Patients Achieving Scaling Success and Scaling Score of None (mITT Population)**

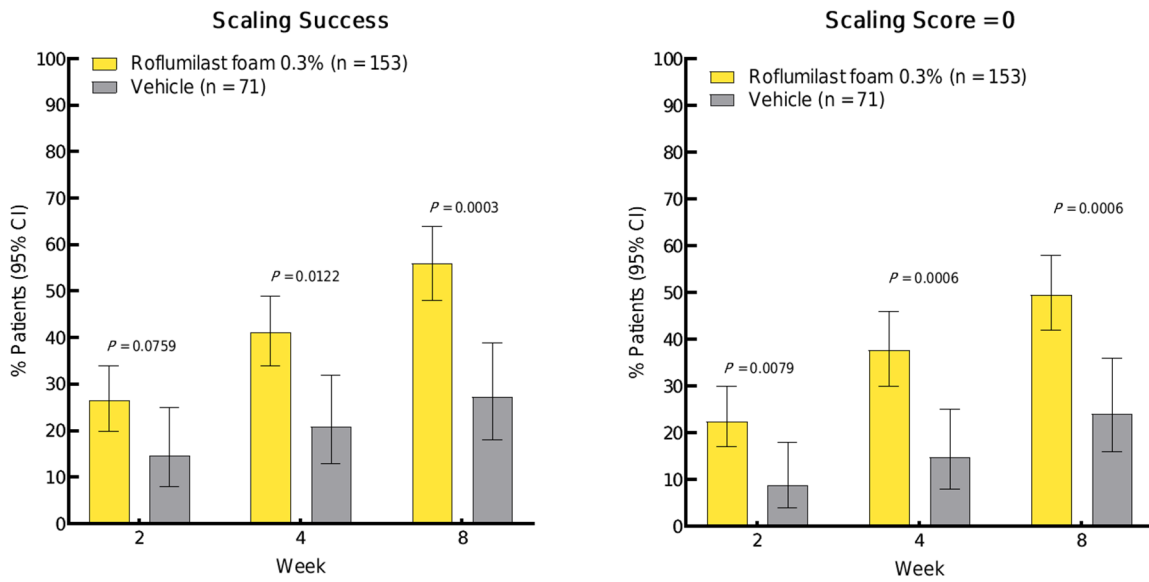

Scaling success = scaling score of 0 or 1 (on a scale of 0 [none] to 3 [severe]) plus a 2-grade improvement from baseline
